# Supplementary material for: Contribution of fine tree roots to the silicon cycle in a temperate forest ecosystem developed on three soil types
Source: Copernicus journal article supplement (doi:10.5194/bg-15-2231-2018), 2018-04-17
Supplement: Supplementary file 1 [file bg-15-2231-2018-supplement.pdf]

Supplement of Biogeosciences, 15, 2231–2249, 2018  
<https://doi.org/10.5194/bg-15-2231-2018-supplement>  
© Author(s) 2018. This work is distributed under  
the Creative Commons Attribution 4.0 License.

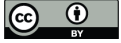

*Supplement of*

## **Contribution of fine tree roots to the silicon cycle in a temperate forest ecosystem developed on three soil types**

**Marie-Pierre Turpault et al.**

*Correspondence to:* Marie-Pierre Turpault ([marie-pierre.turpault@inra.fr](mailto:marie-pierre.turpault@inra.fr))

The copyright of individual parts of the supplement might differ from the CC BY 4.0 License.

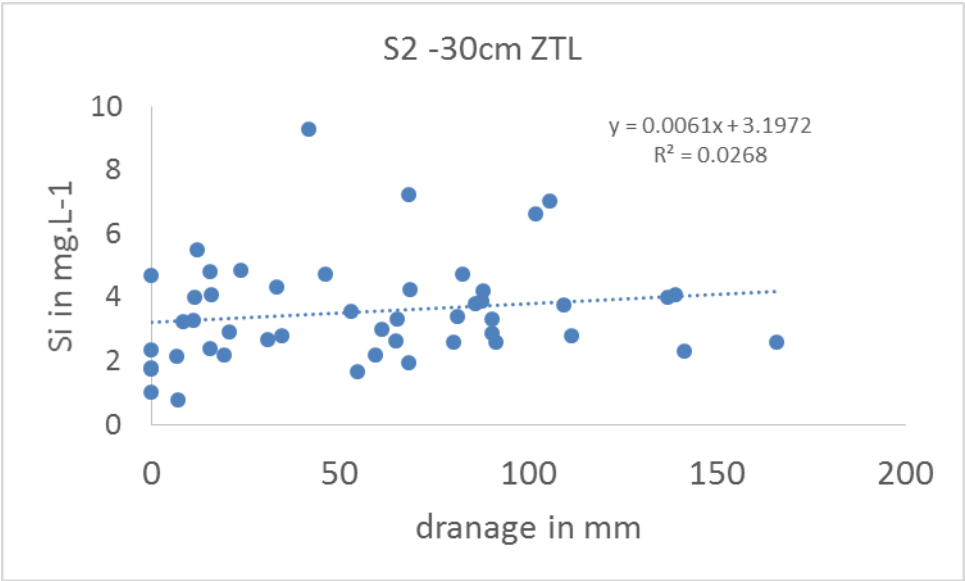

Figure S1: Relationships between drainage and ZTL Si concentration at -30 cm in S2 (eutric cambisol)

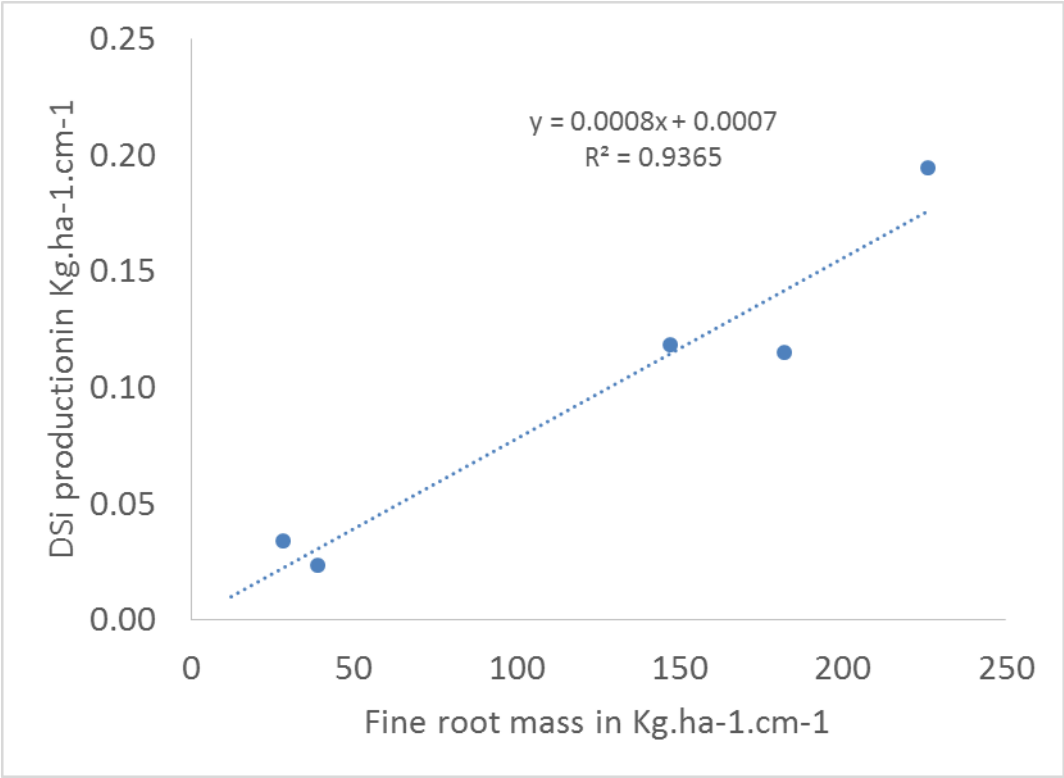

Figure S2: Relationships in fine root content and annual Si production in the 10-60 cm soil layers.
